# Supplementary material for: CuO/Cu/rGO nanocomposite anodic titania nanotubes for boosted non-enzymatic glucose biosensors
Source: Royal Society of Chemistry journal article supplement (doi:10.1039/d3nj00666b), 2023-01-01
Supplement: d3nj00666b1.pdf [file d3nj00666b1.pdf]

## Supplementary Information

### **CuO/Cu/rGO Nanocomposite Anodic Titania Nanotubes for boosted Non-Enzymatic Glucose Biosensor**

Khaled M. Chahrour<sup>\*a,b</sup>, Poh Choon Ooi<sup>\*b</sup>, Ahmed Abdel Nazeer <sup>\*c,d</sup>, Latifa A. Al-Hajji <sup>c</sup>, Peverga R. Jubu <sup>e</sup>,  
Chang Fu Dee <sup>b</sup>, Mohsen Ahmadipour <sup>b</sup>, Azrul Azlan Hamzah<sup>\*b</sup>

- a. *Mechanical Engineering Dept., Faculty of Engineering, Karabuk University, 78050, Karabuk, Turkey.*
- b. *Institute of Microengineering and Nanoelectronics (IMEN), Universiti Kebangsaan Malaysia, 43600 Bangi, Selangor, Malaysia.*
- c. *Nanotechnology and Advanced Materials Program, Energy & Building Research Center, Kuwait Institute for Scientific Research (KISR), P.O Box 24885, Safat, 13109, Kuwait.*
- d. *Electrochemistry Laboratory, Physical Chemistry Department, National Research Center, Giza, Egypt.*
- e. *Department of Physics, University of Agriculture Makurdi (Now Joseph Sarwuan Tarka University Makurdi), P.M.B. 2373, Makurdi, Benue State, Nigeria*

\*Corresponding authors:- [khaledchahrour@karabuk.edu.tr](mailto:khaledchahrour@karabuk.edu.tr); [pcooi@gmx.com](mailto:pcooi@gmx.com); [aanazeer@kISR.edu.kw](mailto:aanazeer@kISR.edu.kw);  
[azlanhamzah@ukm.my](mailto:azlanhamzah@ukm.my)

The applied potential influences the sensing performance of non-enzymatic glucose sensors significantly. To improve glucose sensing performance, the optimum potential of the amperometry test was examined in a voltage range of 0.3 to 0.7 V by measuring the amperometric current of the sensor under the addition of 1 mM glucose. **Fig. S1** shows the current–time curves recorded by applying different voltages. The amperometric current increases markedly with rising the applied potential from 0.3 to 0.6 V and then decreases. Accordingly, the optimum potential used in the study is 0.6 V, as the greatest amount of glucose oxidation occurs at this potential.

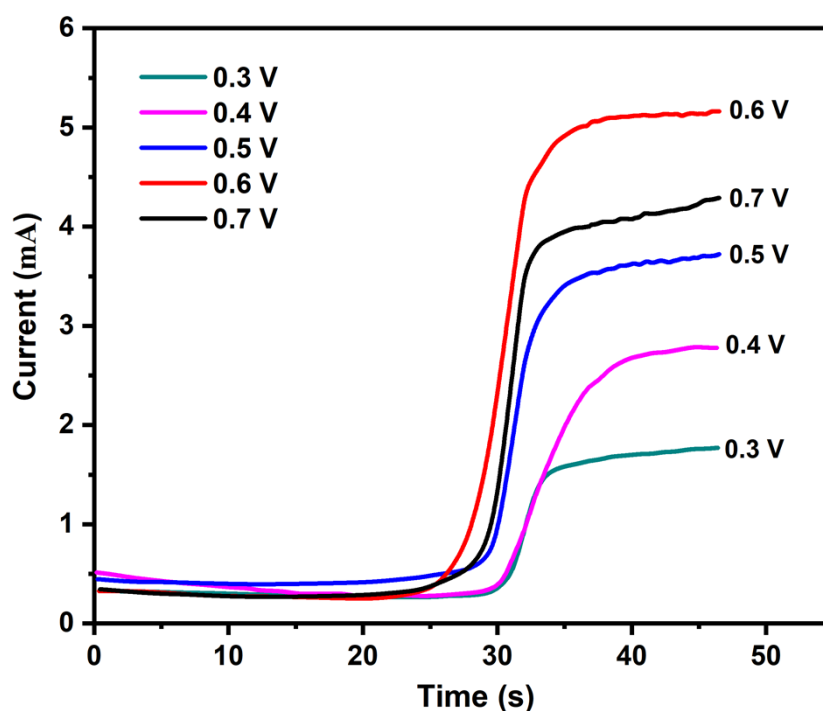

**Figure S1.** The current – time curves of CuO/Cu/GO- ATNT electrode at various potentials from 0.3 to 0.7 V in 0.1 M NaOH solution in the presence of 5 mM glucose.
